# Supplementary material
Source: publisher figshare collection journal article supplement (https://aacr.figshare.com/articles/dataset/_/23853122)
Supplement: Supplementary file 1 [file 41846561]

## Nationwide project

National Cancer Center Hospital, Hokkaido University Hospital, Tohoku University Hospital, National Center for Child Health and Development, Aichi Cancer Center Hospital Kyoto University, Kyushu University Hospital

Molecular Diagnostic Testing (NGS, IHC, etc)

### Target Patient Group

- Rare cancer
- Rare histological subtype
- Carcinoma of unknown primary
- Pediatric cancer
- Hematologic malignancies

I.C. Registration

Review biomarker status

Assignment to biomarker-based clinical study

Follow-up of all patients

Biomarker A

Biomarker B

Biomarker C

• • •

Biomarker  
negative

Drug A  
Clinical study

Drug B  
Clinical study

Drug C  
Clinical study

• •

Drug X  
Clinical study

Drug Y  
Clinical study

• •

Clinical  
trial data  
collection

Large-scale  
Reliable Database

**Supplementary Fig. S1. MASTER KEY PROJECT.**

A large nationwide registry for rare cancers in Japan

Abbreviations: IC, informed consent
